# Supplementary material for: Intravenous fluids in children and young people: summary of NICE guidance
Source: HighWire-hosted journal article supplement (doi:10.1136/bmj.h6388), 2015-12-09
Supplement: bmj.h6388.pdf [file bmj.h6388.pdf]

### 指南

## 儿童和青少年静脉补液:NICE指南概要

### Guidelines

## Intravenous fluids in children and young people: summary of NICE guidance

来源:BMJ 2015;351:h6388 doi: 10.1136/bmj.h6388

不恰当的静脉补液治疗可能带来严重后果,包括因低钠血症<sup>1</sup>、低血容量、器官低灌注,以及高血容量、水肿和心力衰竭导致的死亡或神经系统永久损害。儿童对液体的需求与成人不同,有必要建立针对性的特殊指南<sup>2</sup>。本文将对最新版的英国国家健康与临床优选研究所(NICE)相关指南作一概括介绍<sup>3</sup>。

### 建议

NICE指南的建议内容是在对一些符合纳入标准的最佳研究数据的系统回顾研究以及对成本效益的详细评估的基础之上制定的。当没有符合最低纳入标准的研究数据可采用时,则依据指南制定协作组(GDG)专家们的临床经验和意见提出建议。指南建议的证据级别以斜体字标于方括号中。

除非另有说明,本指南适用的人群年龄涵盖包括新生儿在内的儿童至16岁以下的青少年。

### 评估和监测(图1,2)

#### 液体复苏疗法

- 如果儿童和青少年需要静脉补液复苏治疗,

#### 本指南的新观点

- 静脉补液存在潜在风险;仅用于有适应证时,并必须在密切观察和评估下进行。
- 指南指出:儿童因不恰当静脉补液导致低钠血症,继而引发永久神经系统并发症和死亡的风险高于成人。

### 你必须知道

- 儿童静脉补液治疗期间,必须仔细监测体重和出入量、评估患儿体液状况以及正确选择液体,以避免造成死亡及神经系统永久损害等严重并发症。
- 为了提高患儿对抽血化验的依从性,尽量减少其焦虑,应向家长以及年长患儿解释抽血化验的必要性;对于低龄患儿,可采用分散注意力和安抚措施,并在抽血前使用表浅局麻药。
- 含钠131~154 mmol/L的等张晶体液适合在开始补充维持需要量。
- 儿童静脉补液中如出现恶心、呕吐、嗜睡、意识模糊、易激惹症状,提示可能出现低钠血症,必须由专业医生给予紧急治疗处理。

应使用含钠131~154 mmol/L的无葡萄糖晶体液,按20 ml/kg,在10分钟之内快速推注。已有一些病理情况(如心脏疾病或肾脏疾病)存在时,则须减少补液量。

- 如果足月新生儿需静脉输液复苏治疗,应使用含钠为131~154 mmol/L的无葡萄糖晶体液,按10~20 ml/kg,在10分钟之内快速推注。  
[基于较低到很低质量的随机对照研究和GDG专家们的临床经验和意见制定]

### 常规维持量的补液治疗(图3)

#### 补液和体液再分布

针对足月新生儿、儿童和青少年:

Julie Neilson  
senior research fellow<sup>1</sup>,  
Frank O'Neill  
senior research fellow<sup>1</sup>,  
Dalia Dawoud  
senior health economist and lecturer<sup>1,2</sup>,  
Peter Crean  
guideline development group chair,  
consultant paediatric anaesthetist<sup>3</sup>,  
On behalf of the  
Guideline Development Group

<sup>1</sup>National Clinical Guideline Centre, London, UK;  
<sup>2</sup>Faculty of Pharmacy, Cairo University, Cairo, Egypt; <sup>3</sup>Royal Belfast Hospital for Sick Children, Belfast, UK

Correspondence to:  
J Neilson  
Julie.neilson@replondon.ac.uk

梁璐译  
北京百汇朝外诊所  
杜忠东 校  
首都医科大学附属  
北京儿童医院

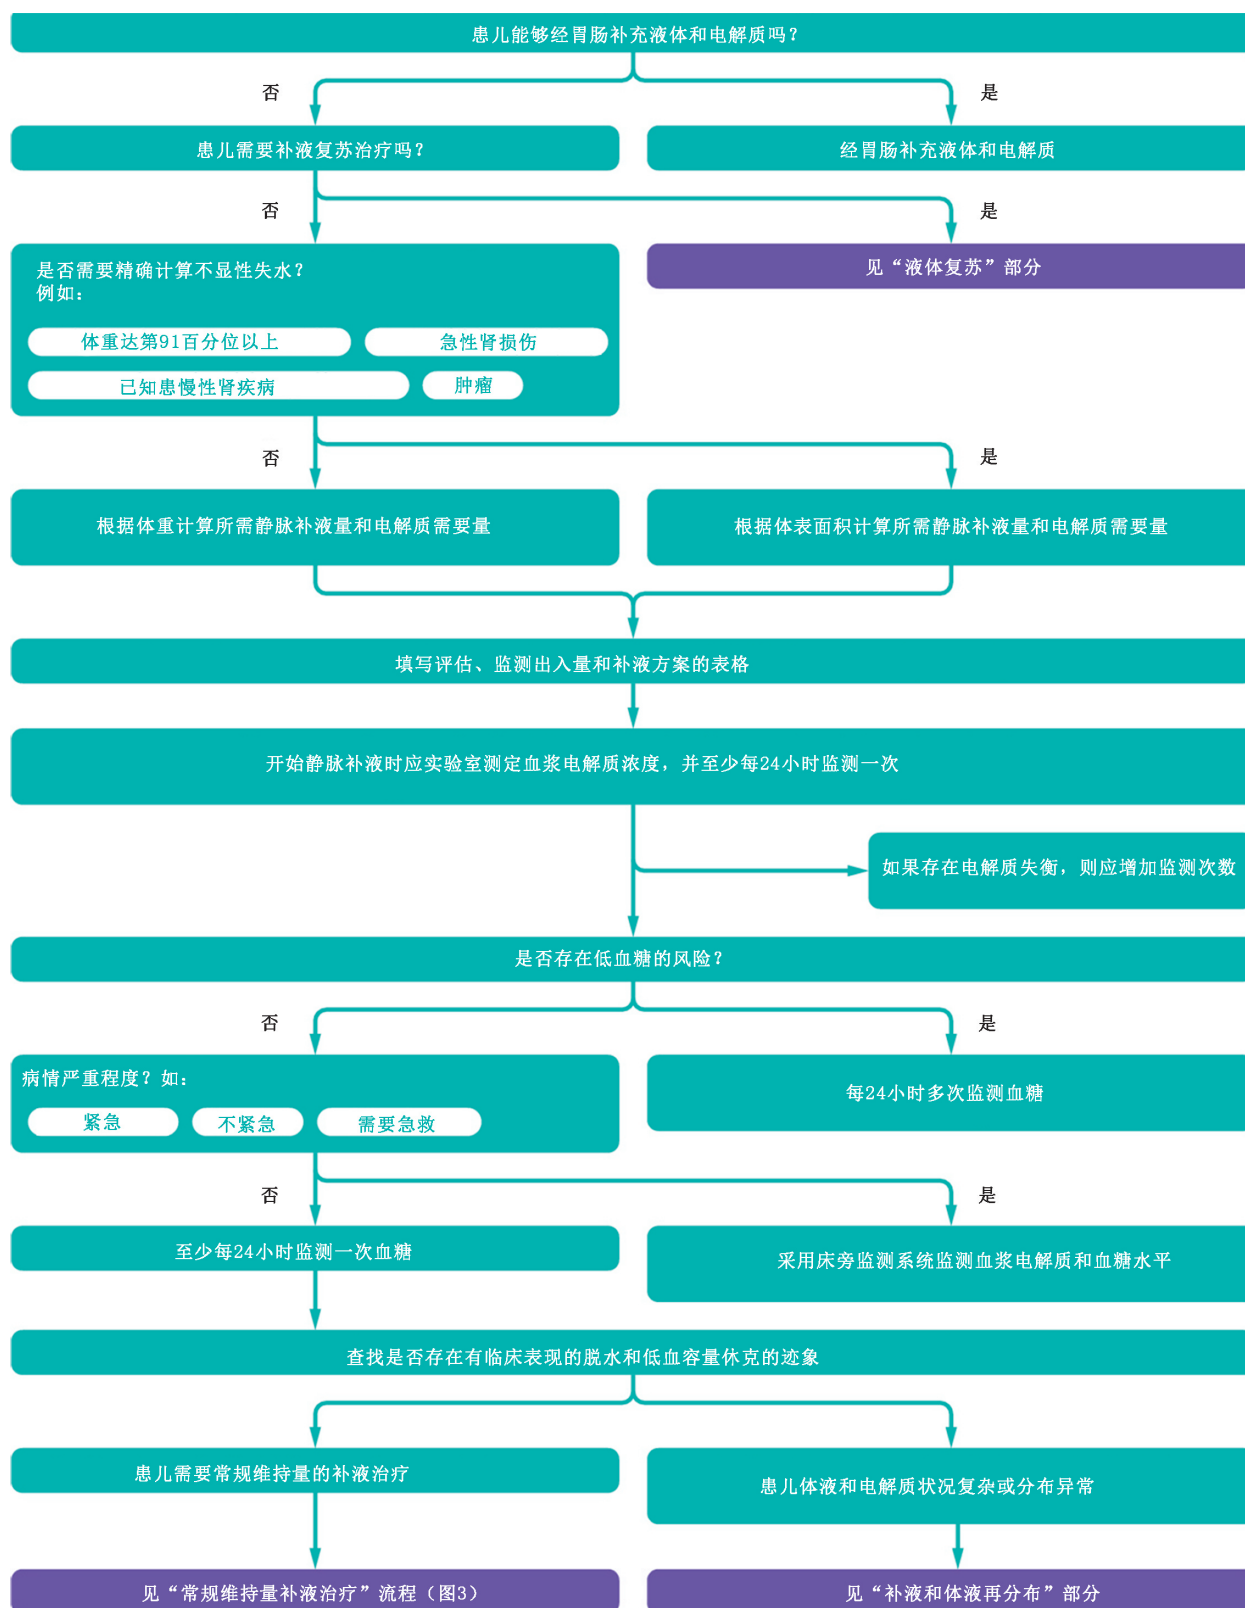

图1 评估和监护流程图

- 根据已有的体液和(或)电解质丢失或增加量、继续丢失量(见图4),或体液异常分布情况(如脓毒症时出现的组织水肿),调整除生理维持量以外的静脉补液量。

- 采用含钠131~154 mmol/L的等渗晶体液纠正体液再分布。
- 采用含钾的0.9%氯化钠溶液补充继续丢失量。
- 根据血浆电解质浓度和血糖结果制定后续的补液方案。

| 无临床表现的脱水     | 有临床表现的脱水           | 低血容量性休克      |
|--------------|--------------------|--------------|
| 清醒、正确应答      | 意识应答改变 (如, 易激惹、嗜睡) | 意识反应减低       |
| 外表状态良好       | 外表状态欠佳             | -            |
| 无眼窝凹陷        | 眼窝凹陷               | -            |
| 黏膜湿润 (非饮水所致) | 黏膜干燥 (非张口呼吸所致)     | -            |
| 血压正常         | 血压正常               | 血压降低 (失代偿休克) |
| 呼吸节律正常       | 呼吸急促               | 呼吸急促         |
| 毛细血管再充盈时间正常  | 毛细血管再充盈时间正常        | 毛细血管再充盈时间延长  |
| 心率正常         | 心率增快               | 心率增快         |
| 肢端脉搏正常       | 肢端脉搏正常             | 肢端脉搏减弱       |
| 皮肤弹性正常       | 皮肤弹性减低             | -            |
| 尿量正常         | 尿量减少               | -            |
| 皮肤颜色无改变      | 皮肤颜色无改变            | 皮肤苍白或发花      |
| 肢端温暖         | 肢端温暖               | 肢端冰冷         |

在有临床表现的脱水的一类中, 随临床表现项目增多和表现程度加重, 脱水程度逐渐加重。若存在上述一项或多项表现, 即可确诊存在低血容量性休克; “-”表明这些表现并非低血容量性休克的特异性表现。本表格摘自“儿童呕吐和腹泻”(NICE指南CG84)中的“评估脱水和休克”的部分

图2 红旗标识有临床表现的脱水<sup>4</sup>。

NICE:英国国家健康与临床优选研究所

[基于很低质量的随机对照研究和GDG专家们的临床经验<sup>4</sup>和意见制定]

### 静脉补液治疗中发生的高钠血症

足月新生儿、儿童和青少年发生高钠血症时, 立即评估患儿当时的体液状况, 并采取下列措施:

- 如果没有脱水的证据, 并已补充过等张液, 可以考虑更换为低张液 (如, 含葡萄糖的0.45%氯化钠溶液)。
- 如果已确诊脱水, 则计算液体丢失量, 在48小时内补足, 补液起始时先使用0.9%氯化钠溶液。
- 如果尚不能明确患儿体液状况, 应测定尿钠和尿比重。
- 如果高钠血症的情况恶化, 或在补充丢失量后未能改善, 应评估所补液体种类, 并考虑更换为低张溶液 (如, 含葡萄糖的0.45%氯化钠溶液)。
- 在纠正高钠血症的过程中, 确保24小时内血浆钠浓度下降幅度不超过12 mmol/L。
- 在治疗的最初24小时内, 每4~6小时监测一次血浆电解质水平, 之后, 根据治疗效果决定监测血浆电解质的频度。

[基于GDG专家们的临床经验和意见制定]

### 静脉补液治疗中发生的无症状性低钠血症

儿童静脉补液治疗过程中发生低钠血症具有潜在危险, 并与患儿发生永久神经损害和死亡有关。

- 如果是足月新生儿、儿童和青少年发生低钠血症, 应当立即评估患儿体液状况, 如果正在输注低张液体, 需更换为等张液体 (如, 0.9%氯化钠溶液)。
- 如果儿童和青少年发生血容量过多或面临高血容量风险 (例如, 可能抗利尿激素分泌增多), 则应当:
  - 将维持量限制为常规需要量的50%~80%; 或者
  - 减少维持量, 以每24小时300~400 ml/m<sup>2</sup>计算不显性失水, 再加上尿量。

### 静脉补液治疗中发生的急性有症状性低钠血症

下列症状与静脉补液治疗过程中发生的急性低钠血症有关, 包括:

- 头痛
- 恶心呕吐
- 意识模糊和定向力障碍
- 易激惹
- 嗜睡
- 意识障碍
- 惊厥
- 昏迷
- 呼吸暂停

足月新生儿、儿童和青少年发生急性有症状性低钠血症时, 不能仅仅单独依靠限制液量来处理急性低钠血症性脑病。而是应当立即评估患儿体液状况, 立即征询专业医生的治疗意见 [例如, 向儿科重症监护病房 (ICU) 团队咨询]。建议采取以下措施:

- 在10~15分钟内, 按2 ml/kg (最大量100 ml) 快速推注2.7%氯化钠溶液。
- 在上述初始剂量完成后, 如果仍有症状, 则在接下来的10~15分钟内, 继续另一剂按2 ml/kg (最大量100 ml) 快速推注2.7%氯化钠溶液。
- 在第二剂完成后, 如果仍有症状, 则应当测定血浆钠离子水平, 在接下来的10~15分钟内, 给予第三剂按2 ml/kg (最大量100 ml) 快速推注2.7%氯化钠溶液。
- 至少每小时监测一次血钠浓度。
- 当症状缓解时, 可根据治疗反应, 减少血钠监测的次数。
- 当症状完全缓解后, 应确保24小时内血钠水平的增加幅度不超过12 mmol/L。

[基于GDG专家们的临床经验和意见制定]

### 为达到理想疗效所需克服的障碍

静脉补液治疗是住院儿童治疗的核心部分之一。必

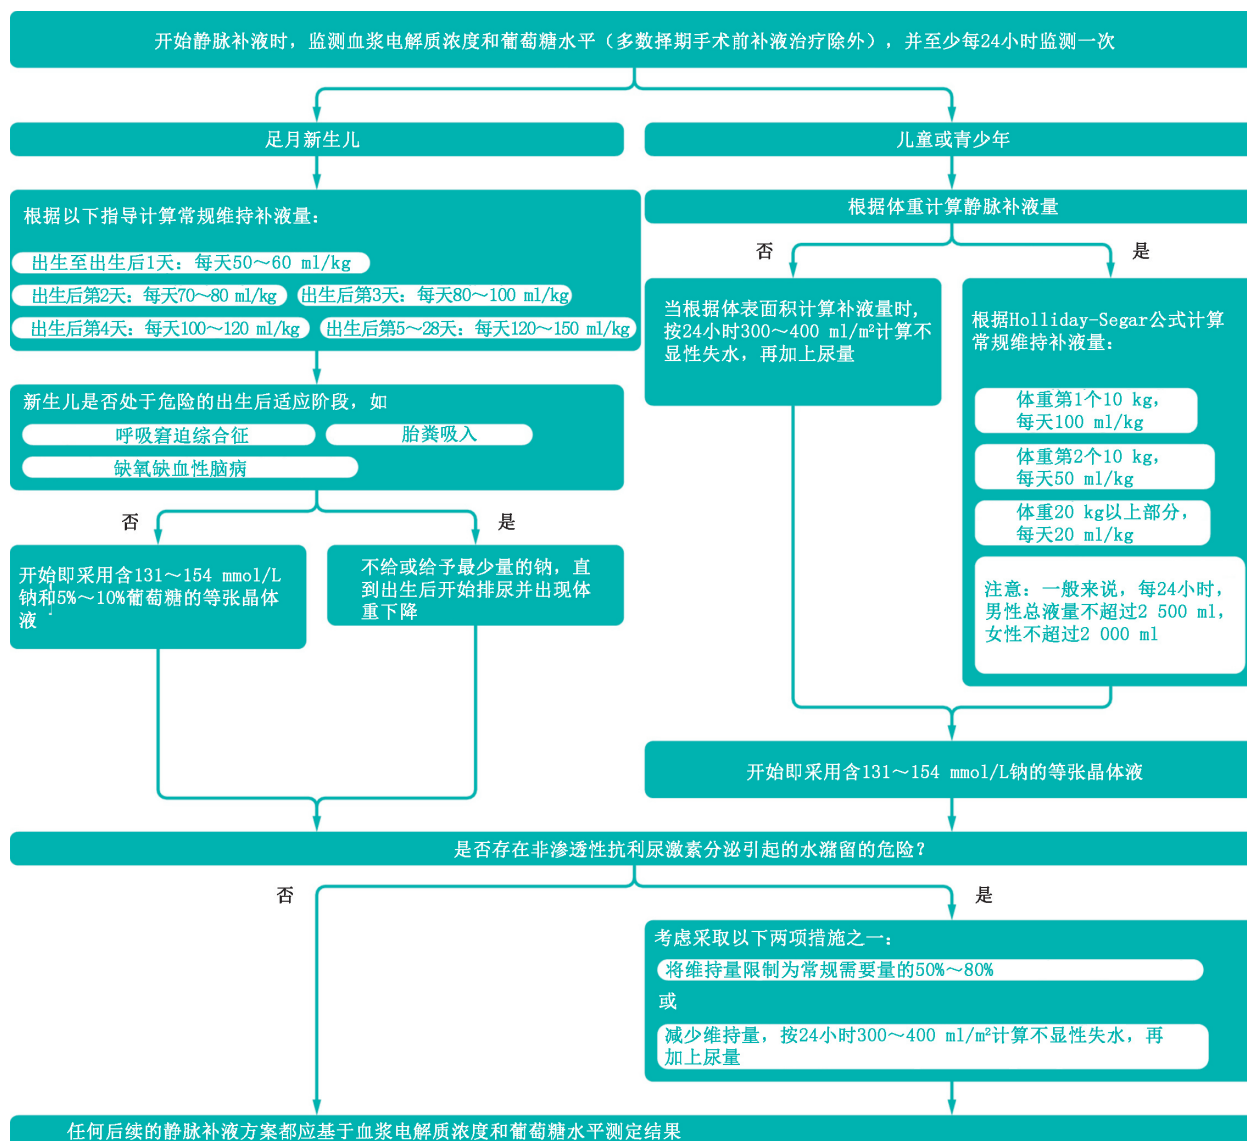

图3 常规维持量的补液流程图

### 患儿如何参与本文创作？

指南制定委员会，包括参与指南撰写的编外成员，在此一并纳入。

须尽一切努力遵循指南。要做到及时发现因静脉补液处置不当造成的不良事件，并能找出两者之间的因果关系，不是一件简单容易的事情。要通过抽血化验指导补液治疗，会让患儿感到痛苦和恐惧，故应向家长和年长懂事的儿童解释这些化验检查的必要性，从而减轻其焦虑，增强治疗依从性。对低龄患儿可以采用分散注意力和一些安抚措施，并在静脉穿刺前使用表浅局麻药。采用补液处方模板将有助于加强对患儿病情的密切观察和记录<sup>5</sup>。这样的做法虽然可能会增加医护的工作时间，但有助于预防严重并发症的发生，并减少实际诊疗行为的偏差。

### 指南相关的进一步信息

出于安全起见，为预防患儿因低张液体补液造成的低钠血症，国家患者安全委员会已经制定了一个静脉补液处方模板<sup>5</sup>。儿童比成人因低钠血症发生脑水肿和神经系统并发症的风险更高。文献报道，儿童因不当的低张液体补液治疗导致死亡的案例很多<sup>6</sup>。对补液治疗的儿童进行密切监测和评估，对于指导后续治疗非常重要，这不仅是对医护工作的挑战，也给患儿和家长带来痛苦。就结果而言，监测和评估往往不能达到最佳，不能恰当评估体液和电解质状况并给予恰当的补液治疗。正是基于对这些现状的担忧，才制定了本指南。

当本指南发表时(2015年12月)，有一些用于儿童和青少年静脉补液的溶液还未授权在英国上市。医生应当遵循

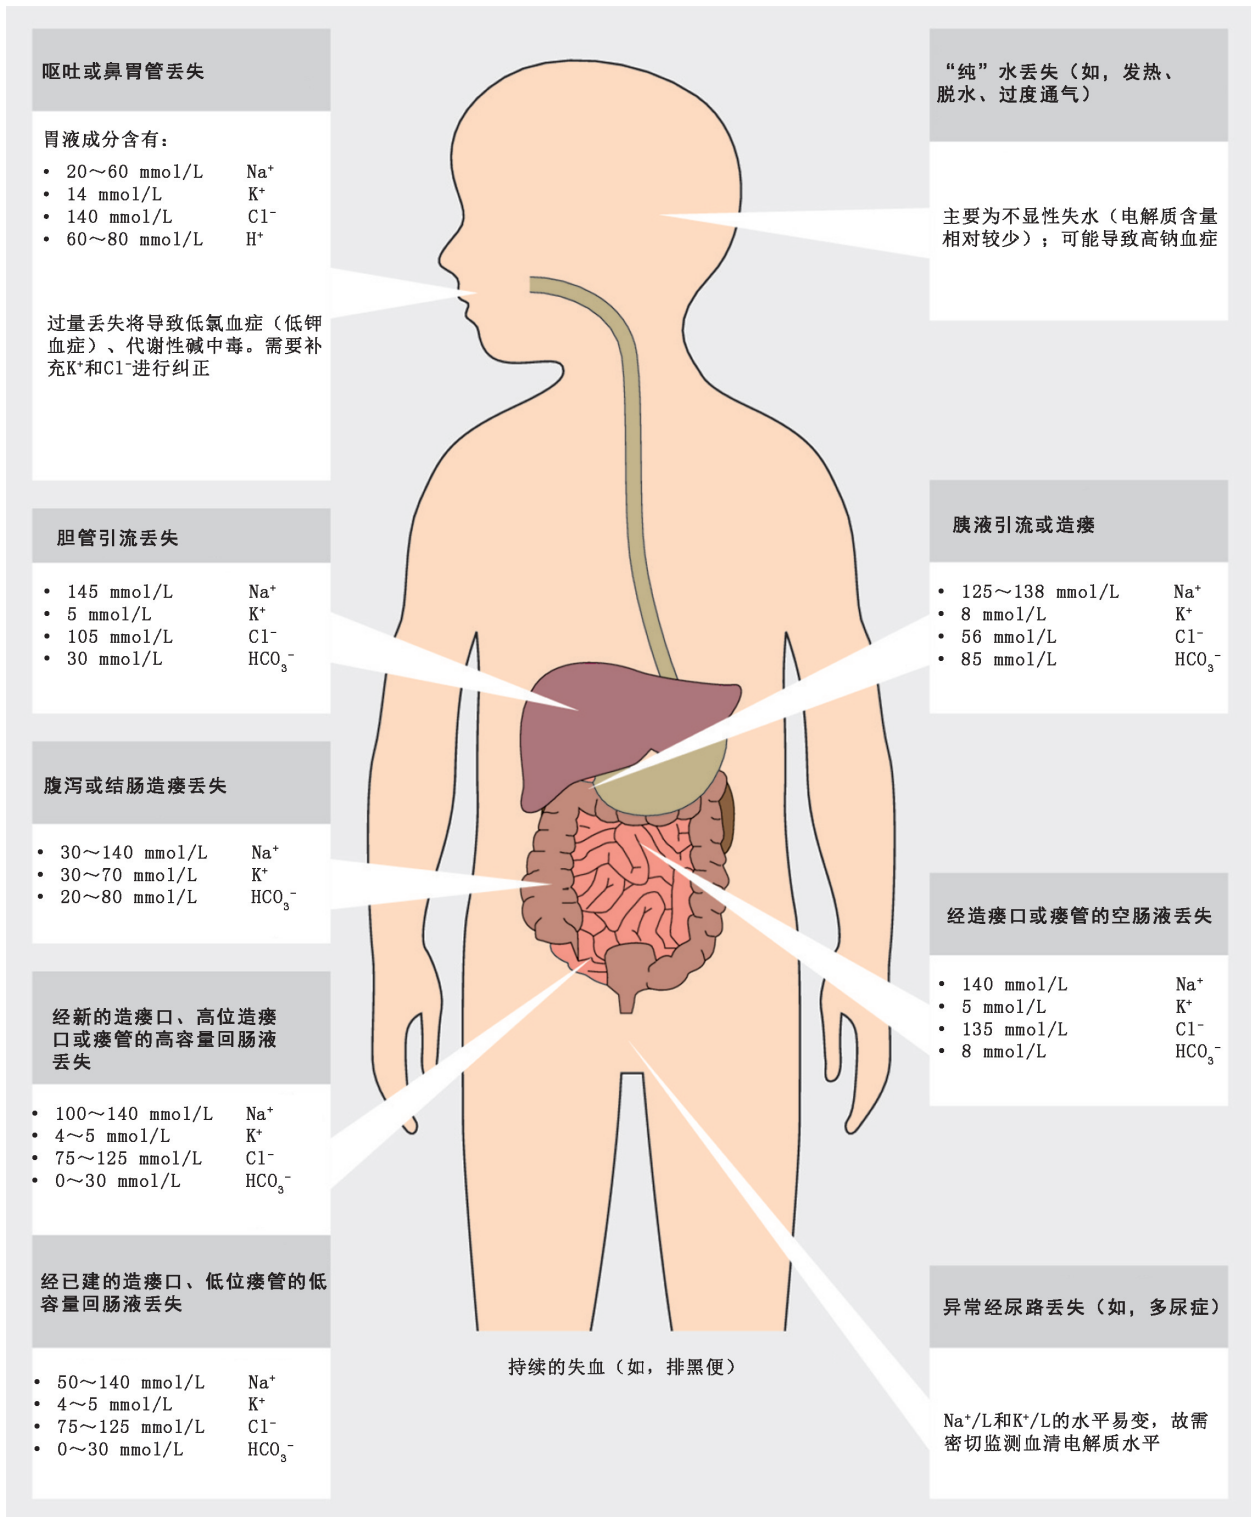

图4 儿童体液和电解质继续丢失量简图。由国家临床指南中心授权转载

相关专业指导<sup>7</sup>。

指南的具体实践

- 任何接受静脉补液治疗儿童的液体需要量,是否至少每12小时进行一次临床再次评估?
- 任何接受静脉补液治疗的儿童,是否至少每24小时监测

一次尿素和电解质?

方法

本指南的制定采用目前英国国家健康与临床优选研究所(NICE)指南制定的策略([www.nice.org.uk/article/PMG20/chapter/1%20Introduction%20and%20overview](http://www.nice.org.uk/article/PMG20/chapter/1%20Introduction%20and%20overview))。指南制定

协作组(GDG)的专家构成包括多名资深儿科麻醉医生、1名资深儿科肾脏病专家、1名儿科护理专家、1名资深儿科急诊科专家、1名儿科专家、1名儿科高级护理专家、1名资深新生儿科专家、1名小儿外科和泌尿科专家、1名临床药学专家、1名儿科重症监护病房(ICU)专家和1名患儿护理员。

由GDG成员提出临床问题,收集整理临床研究数据,对经文献复习和经济学分析后提出的干预措施和治疗策略进行成本效益评估。指南草案经过严格的审批程序,邀请利益相关者组织给予评价;协作组在充分采纳了全部评审意见后,制定出指南最终版本。对研究证据级别的审查依据GRADE方法([www.gradeworkinggroup.org](http://www.gradeworkinggroup.org))。这种方法更侧重于对纳入研究的研究结果进行质量评级,而不是对临床研究本身的质量进行评级。

NICE制定了2个版本的指南:完全版([www.nice.org.uk/guidance/ng29/evidence](http://www.nice.org.uk/guidance/ng29/evidence))和精简版([www.nice.org.uk/guidance/ng29](http://www.nice.org.uk/guidance/ng29))。这两个版本以及一个路径(<http://pathways.nice.org.uk/pathway>)都可以通过NICE网站获取。指南的更新也已列入NICE指南制定计划。

The members of the Guideline Development Group were Peter Crean, Jan Dudley, Deborah Evans, Andrew Fitzsimons, Chris Gildersleve, Lyda Jadresic, Ann Kelly, Jayne Kranat, Aung Soe, Stephanie Warne, Andrew Wignell, and Peter Wilson. The members of the technical team were Joanna Ashe, Katie Broomfield, Dalia Dawoud, Elisabetta Fenu, Edward Griffin, Jennifer Hill, Katie Jones, Samantha Jones, Julie Neilson, Frank O'Neill, Gill Ritchie, and Cheentan Singh.

贡献者(Contributors): All authors contributed to the conception and drafting of this article, and to revising it critically. They have all approved this version. JN is guarantor.

资助(Funding): Julie Neilson, Frank O'Neill and Dalia Dawoud are employees of the National Clinical Guideline Centre, at the Royal

College of Physicians which is commissioned and funded by NICE to develop clinical guidelines.

利益竞争(Competing interests): We declare no competing interests, based on NICE's policy on conflicts of interests (available at <http://www.nice.org.uk/Media/Default/About/Who-we-are/Policies-and-procedures/code-of-practice-for-declaring-and-managing-conflicts-of-interest.pdf>).

The authors' full statements can be viewed at [www.bmj.com/content/bmj/351/bmj.h6388/related#datasupp](http://www.bmj.com/content/bmj/351/bmj.h6388/related#datasupp).

来源与同行评议(Provenance and peer review): Commissioned; not externally peer reviewed.

## 参考文献

- 1 National Patient Safety Agency. Reducing the risk of hyponatraemia when administering intravenous infusions to children. 2007. [www.nrls.npsa.nhs.uk/resources/?EntryId45=59809](http://www.nrls.npsa.nhs.uk/resources/?EntryId45=59809).
- 2 National Institute for Health and Care Excellence. Intravenous fluid therapy in over 16s in hospital. (Clinical guideline 174.) 2013. [www.nice.org.uk/guidance/cg174](http://www.nice.org.uk/guidance/cg174).
- 3 National Institute for Health and Care Excellence. Intravenous fluids therapy in children. (Clinical guideline NG29.) 2015. [www.nice.org.uk/guidance/ng29](http://www.nice.org.uk/guidance/ng29).
- 4 National Institute for Health and Care Excellence. Diarrhoea and vomiting caused by gastroenteritis: diagnosis, assessment and management in children younger than 5 years. (Clinical guideline 84.) 2009. [www.nice.org.uk/guidance/cg84](http://www.nice.org.uk/guidance/cg84).
- 5 National Patient Safety Agency. Template for prescriptions for intravenous infusions for children. 2014 [www.npsa.nhs.uk/EasysiteWeb/getresource.axd?AssetID=2334&type](http://www.npsa.nhs.uk/EasysiteWeb/getresource.axd?AssetID=2334&type).
- 6 Moritz ML, Ayus JC. New aspects in the pathogenesis, prevention, and treatment of hyponatremic encephalopathy in children. *Pediatr Nephrol* 2010;25:1225-38.
- 7 Joint Formulary Committee. British national formulary for children (BNFC). British Medical Association; Royal Pharmaceutical Society of Great Britain, 2015.

BMJ takes no responsibility for the accuracy of the translation from the published English language original and is not liable for any errors that may occur.

# BMJ
